# Supplementary material for: The Association Between Falls and Physical and Psychological Conditions in Physically Disabled Elderly People: A Retrospective Cohort Study
Source: Research Square preprint supplement (doi:10.21203/rs.3.rs-798872/v1), 2021-08-30
Supplement: Supplementary file 1 [file e842aa28129ba892f97ec302.docx]

TABLE S1 Basic information of participants

|  | Number | Gender (M/F) | Age | Height (cm) | Weight (kg) | Duration of disability (yr.) |
| --- | --- | --- | --- | --- | --- | --- |
|  |
| Polio Group | 75 | 45/30 | 64.4±4.9 | 163.9±8.1 | 63.3±10.2 | 62.6±5.2 |
| No-Polio Group | 71 | 46/25 | 64.0±2.4 | 164.8±8.0 | 65.5±9.5 | 29±22.4 |

TABLE S2 Demographic information of participants

|  |  | Polio Group | | No-Polio Group | |
| --- | --- | --- | --- | --- | --- |
|  |  | n | % | n | % |
| Education | Primary School | 3 | 4.0% | 6 | 8.5% |
| Secondary School | 39 | 52.0% | 31 | 43.7% |
| High School | 28 | 37.3% | 24 | 33.8% |
| College Degree or above | 5 | 6.7% | 10 | 14.1% |
| Marital Status | Unmarried | 5 | 6.7% | 5 | 7.0% |
| Married | 60 | 80.0% | 57 | 80.3% |
| Divorce | 10 | 13.3% | 9 | 12.7% |
| Family Income | 1000-3000 | 3 | 4.0% | 5 | 7.0% |
| 3000-5000 | 31 | 41.3% | 17 | 23.9% |
| 5000-10000 | 34 | 45.3% | 38 | 53.5% |
| >10000 | 7 | 9.3% | 11 | 15.5% |
| Grade of Disability | Level 2 | 3 | 4.0% | 2 | 2.8% |
| Level 3 | 32 | 42.7% | 26 | 36.6% |
| Level 4 | 40 | 53.3% | 43 | 60.6% |
| Walking Assistive Device Use | Yes | 33 | 44.0% | 29 | 40.8% |
| No | 42 | 56.0% | 42 | 59.2% |

TABLE S3 Musculoskeletal conditions in polio and no-polio disability group

|  | Polio Group | | No-Polio Group | |
| --- | --- | --- | --- | --- |
|  | n | % | n | % |
| Contracture | 69 | 92.0% | 49 | 69.0% |
| Short Limb | 71 | 94.7% | 32 | 45.1% |
| Scoliosis | 13 | 17.3% | 10 | 14.1% |
| Numbness | 28 | 37.3% | 28 | 39.4% |
| Pain | 36 | 48.0% | 43 | 60.6% |
| Other | 3 | 4.0% | 7 | 9.9% |

TABLE S4 The distribution of musculoskeletal conditions number in polio and no-polio disability group

|  |  | Polio Group | | No-Polio Group | |
| --- | --- | --- | --- | --- | --- |
|  |  | n | % | n | % |
| Number of Musculoskeletal conditions | 0 | 0 | 0.0% | 5 | 7.0% |
| 1 | 2 | 2.7% | 12 | 16.9% |
| 2 | 21 | 28.0% | 22 | 31.0% |
| 3 | 34 | 45.3% | 18 | 25.4% |
| 4 | 16 | 21.3% | 11 | 15.5% |
| 5 | 2 | 2.7% | 3 | 4.2% |

TABLE S5 The psychological status of participants

|  |  | Polio Group | No-Polio Group |
| --- | --- | --- | --- |
| Stigma | Score | 10.0±3.6 | 9.6±4.1 |
| Anxiety | Standard Score | 39.5±8.3 | 40.0±10.7 |
| Mild | 11 | 6 |
| Moderate | 0 | 7 |
| Depression | Standard Score | 40.5±10.9 | 41.6±12.4 |
| Mild | 11 | 9 |
| Moderate | 6 | 8 |
| Heavy | 0 | 1 |

TABLE S6 The mobility, activity of daily living, and physical activity of participants

|  |  |  | Polio Group | No-Polio Group |
| --- | --- | --- | --- | --- |
| Timed-Up-and-Go (seconds) | | | 15.9±6.9 | 13.8±5.3 |
| Functional Gait Assessment | | | 13.0±5.9 | 14.9±6.1 |
| Instrumental Activity of Daily Living | | | 13.0±1.0 | 12.5±1.9 |
| Physical Activity | Intensity (MET·min/week) | | 3032.3±1937.3 | 2375±1726.9 |
| Level | High | 29 | 20 |
| Medium | 34 | 39 |
| Low | 12 | 12 |
| Sedentary Time (minutes) | | 438.9±201.0 | 471.7±193.1 |

TABLE S7 The number of falls of participants in the last year

|  |  | Polio Group | | No-Polio Group | |
| --- | --- | --- | --- | --- | --- |
|  |  | n | % | n | % |
| Number of Falls | 0 | 36 | 48.0% | 56 | 78.9% |
| 1 | 3 | 4.0% | 3 | 4.2% |
| 2 | 10 | 13.3% | 4 | 5.6% |
| 3 | 11 | 14.7% | 4 | 5.6% |
| 4 | 6 | 8.0% | 3 | 4.2% |
| 5 | 6 | 8.0% | 1 | 1.4% |
| 6 | 2 | 2.7% | 0 | 0.0% |
| 7 | 1 | 1.3% | 0 | 0.0% |
